# Supplementary material for: Thermodynamic Stability Is a Strong Predictor for the Delivery of DARPins to the Cytosol via Anthrax Toxin
Source: MDPI journal article supplement (doi:10.3390/pharmaceutics13081285), 2021-08-18
Supplement: s1 [file s1]

*Supplementary information*

# Thermodynamic Stability Is a Strong Predictor for Delivery of DARPins to the Cytosol via Anthrax Toxin

Lukas Becker <sup>1</sup>, Jasleen Singh Badwal <sup>1</sup>, Fabian Brandl <sup>1</sup>, Wouter P. R. Verdurmen <sup>2</sup> and Andreas Plückthun <sup>1,\*</sup>

<sup>1</sup>Dept. of Biochemistry, University of Zurich, Winterthurerstr. 190, 8057 Zurich, Switzerland

<sup>2</sup>Dept. of Biochemistry, Radboud Institute for Molecular Life Sciences (RIMLS), Radboud University Medical Center, Geert Grooteplein 28, 6525 GA, Nijmegen, The Netherlands

\* Correspondence: correspondence to [plueckthun@bioc.uzh.ch](mailto:plueckthun@bioc.uzh.ch)

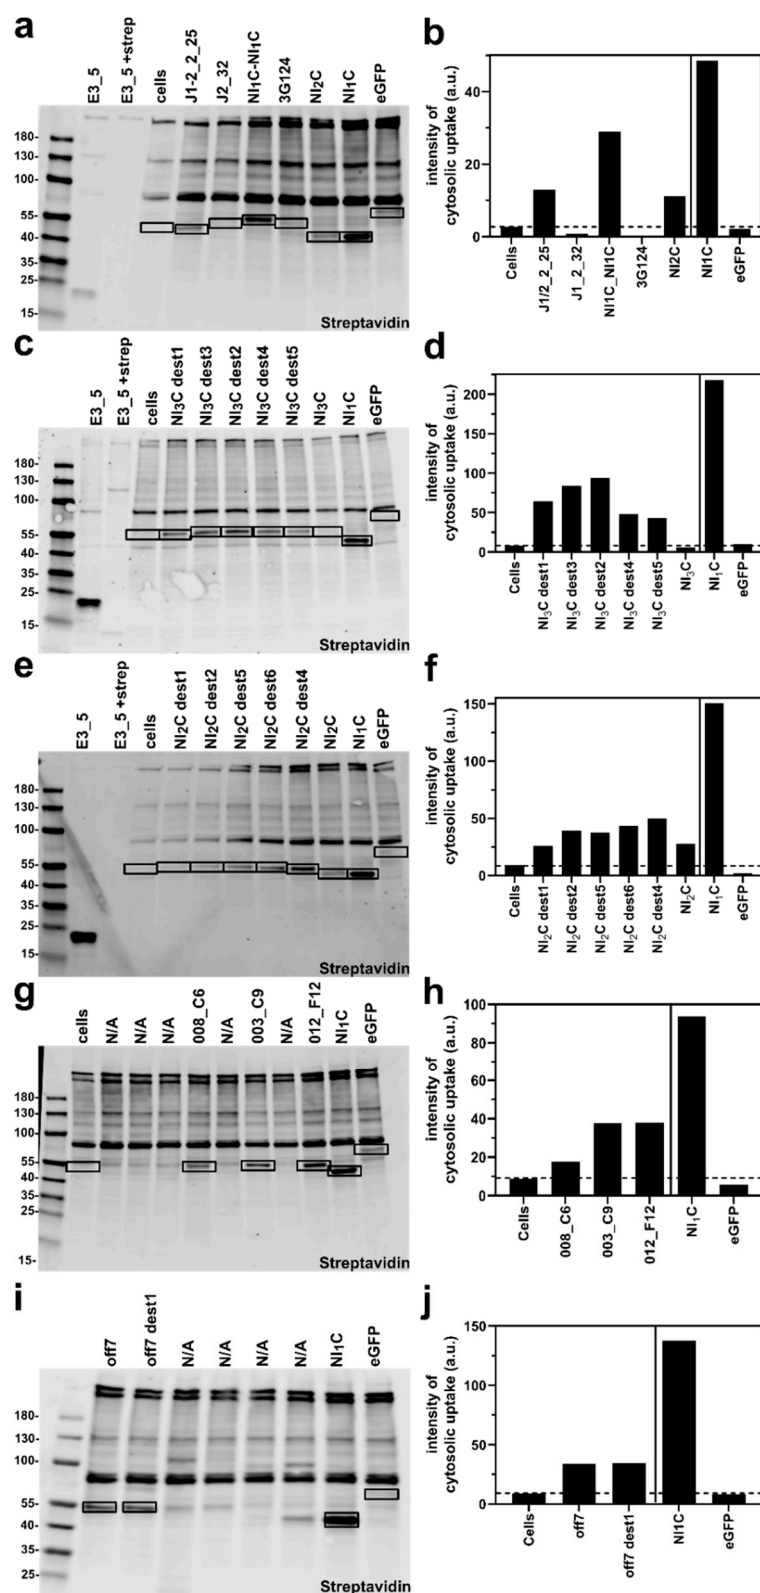

**Figure S1.** Western blot and quantification showing delivery of different LF<sub>N</sub>-cargo constructs with PA<sub>wt</sub>-SANTXR-Ac2. (a, c, e, g, i) Cargo proteins delivered to the cytosol are biotinylated by cytoplasmic BirA and stained with Streptavidin IRDye 680LT (b, d, f, h, j) Quantification of Western blot bands from (a, c, e, g, i). The dashed lines represent background signals (i.e. cells only). NI1C and eGFP are used as delivery controls for maximum signal intensity of cytosolic uptake (NI1C) and no cytosolic localization (eGFP). Destabilized (dest) DARPs have been described previously [1] and the location of mutations is listed in Table 1 in the main text and Supplementary Figure S3.

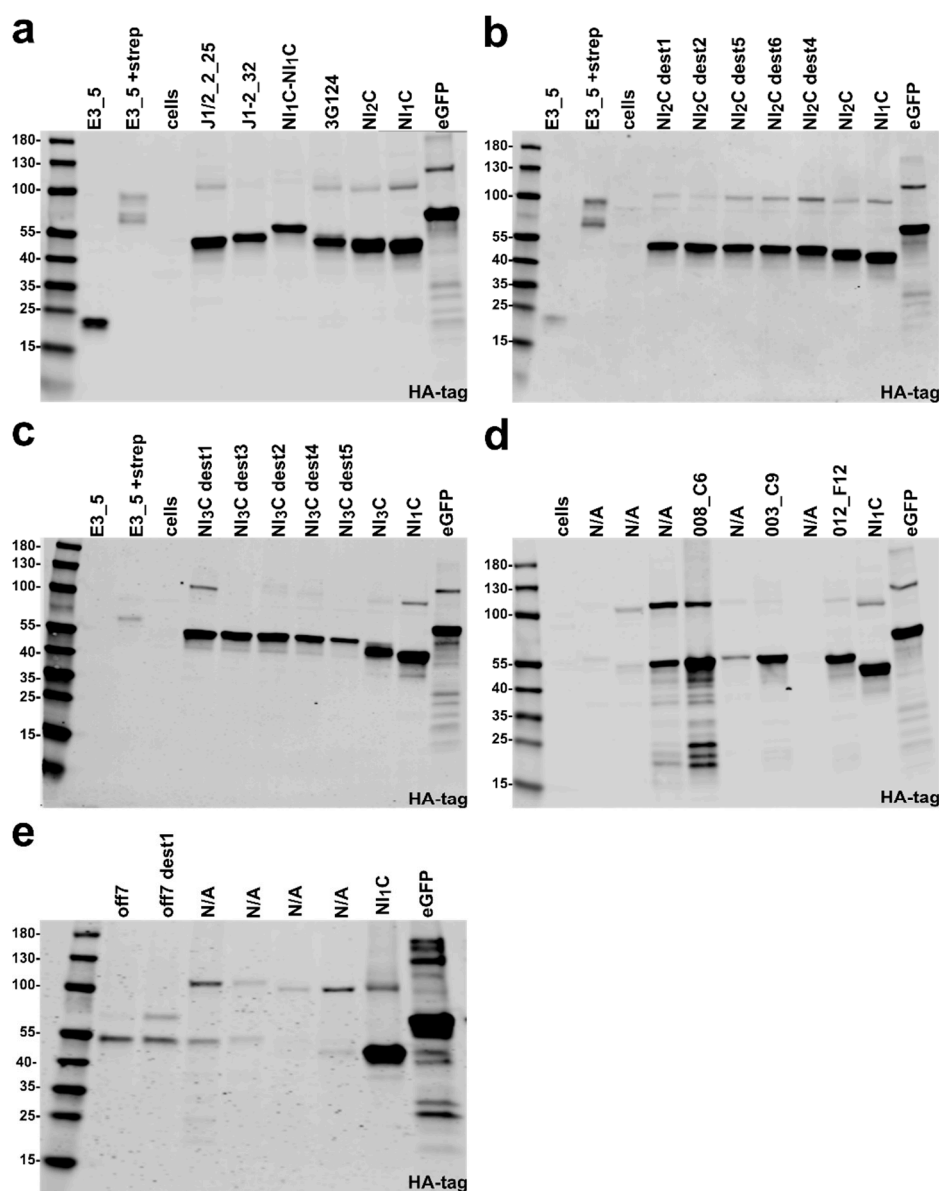

**Figure S2.** (a-e) Total cellular uptake measured via HA-tag of the LFN-cargo. This corresponds to the samples of the BirA assay in Figure S1. Destabilized (dest) DARPinS (b, c) have been described previously [1] and the location of mutations is listed in Table 1 in the main text and Supplementary Figure S3.

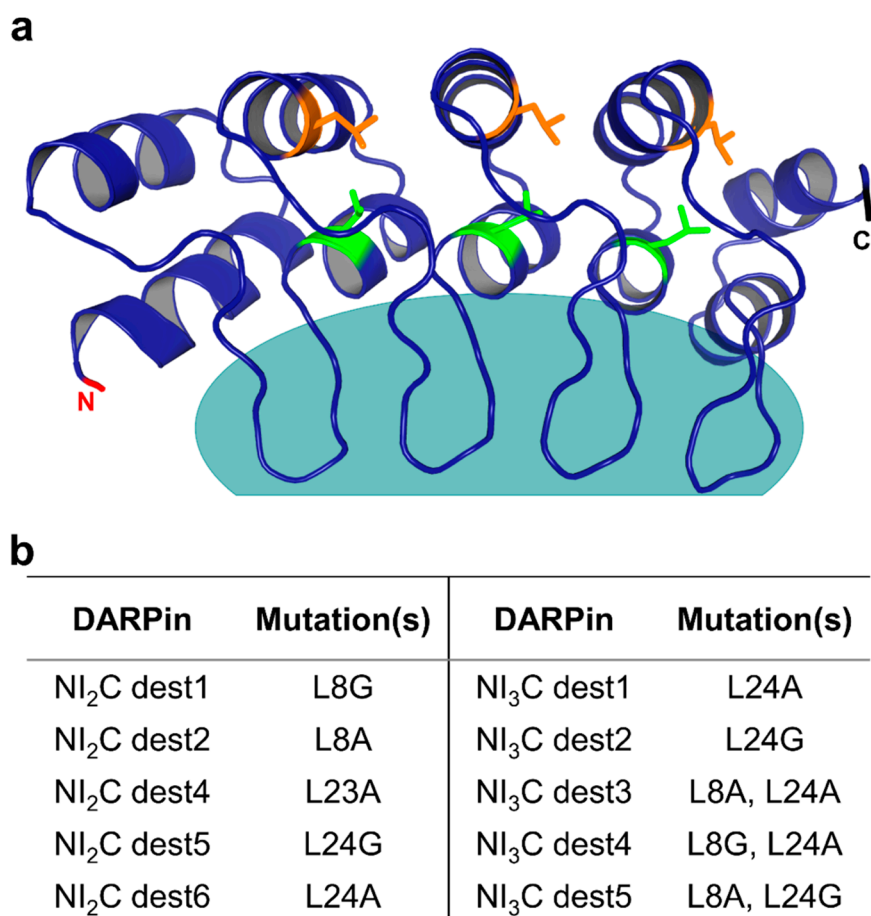

**Figure S3.** Destabilizing mutations in DARPin framework as published previously [1]. (a) Positions of framework mutation of each internal repeats are represented in green (L8) and orange (L24). The respective DARPin target binding area is represented by the grey area, spatially distant to the framework mutations. N and C termini are labelled in red or black, respectively; structural representation adapted from PDB ID 1svx. (b) Position and amino acid substitution of destabilized DARPins of each internal repeat; each position was mutated in all three internal repeats.

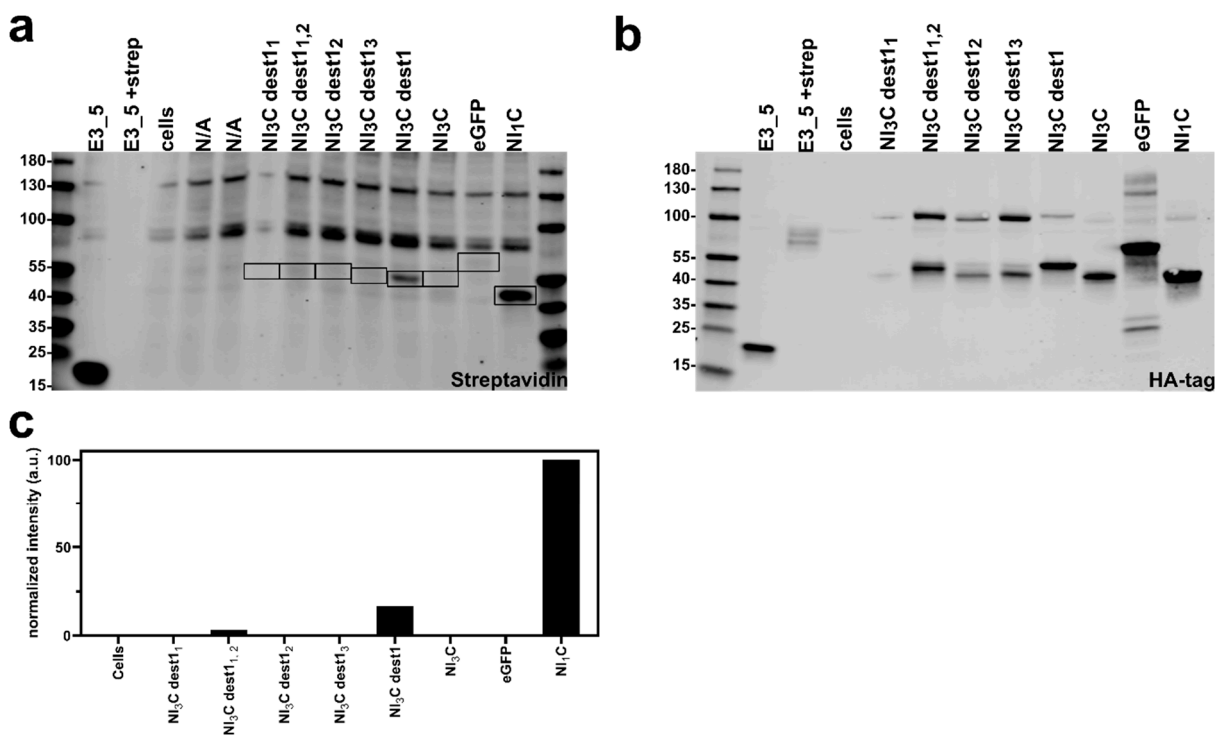

**Figure S4.** Western blot and quantification showing delivery of different LFN-cargo constructs of the consensus DARPin NI<sub>3</sub>C and variants of the NI<sub>3</sub>C dest1 with PA<sub>wt</sub>-SANTXR-Ac2. Variants with the L24A mutation are mutated only in the first (NI<sub>3</sub>C dest1<sub>1</sub>), only the second (NI<sub>3</sub>C dest1<sub>2</sub>), only the third (NI<sub>3</sub>C dest1<sub>3</sub>), first and second (NI<sub>3</sub>C dest1<sub>1,2</sub>) or second and third (NI<sub>3</sub>C dest1<sub>2,3</sub>) internal repeat. Western Blots (a, b) and respective quantification (c) of the biotin ligase assay, showing efficient cytosolic translocation only for the fully destabilized variant NI<sub>3</sub>C dest1.

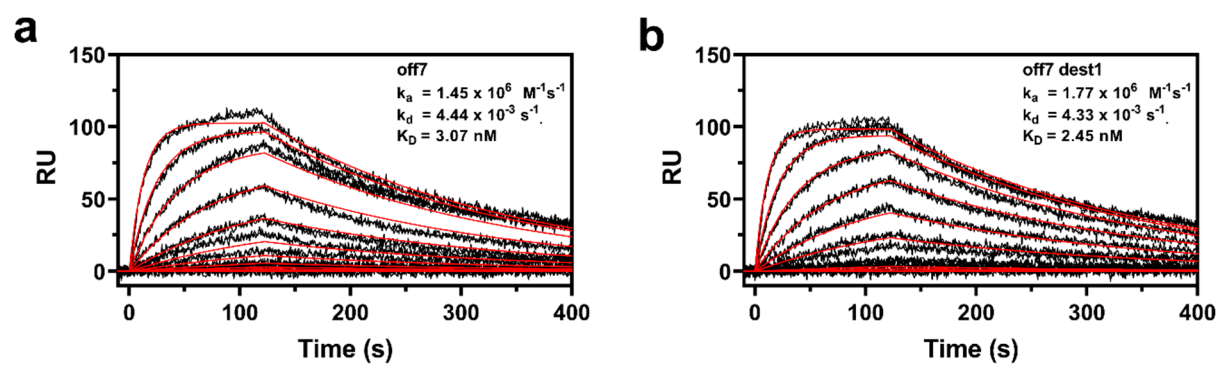

**Figure S5.** SPR measurement of off7 and off7 dest1 (L24A mutation in all three internal repeats) showing a similar  $K_D$  for target binding.

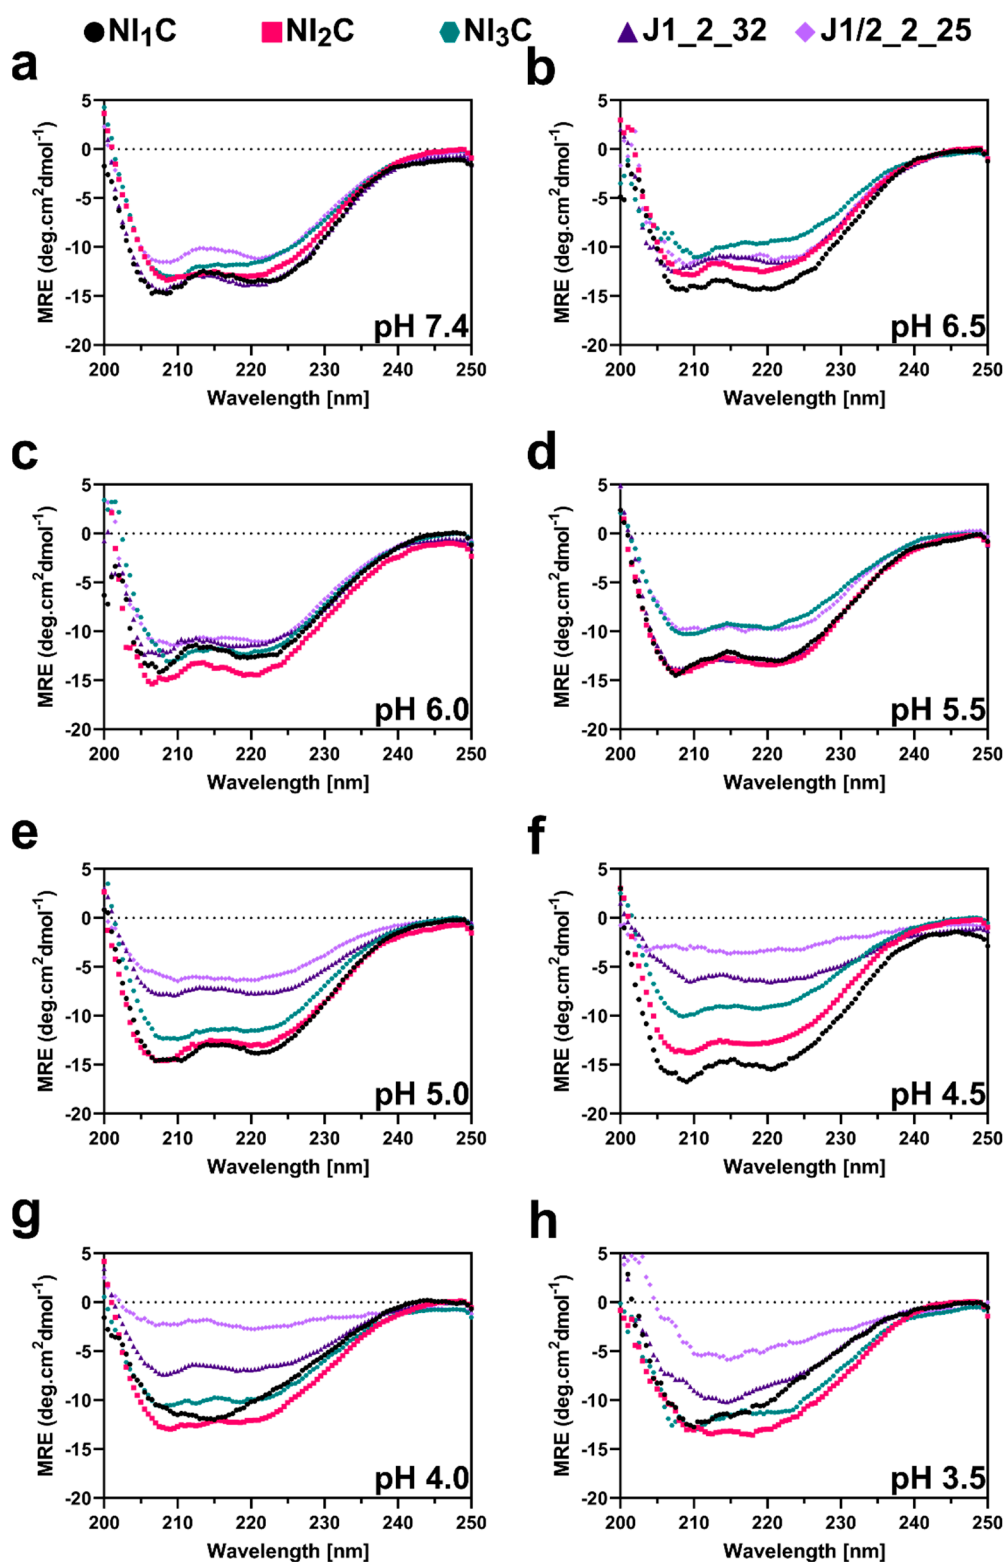

**Figure S6.** pH titration of different DARPins. NI<sub>1</sub>C, NI<sub>2</sub>C, NI<sub>3</sub>C, J1/2\_2\_25 and J1\_2\_32 were incubated overnight in PBS at pH 7.4 (a), MES at pH 6.5 (b), MES at pH 6.0 (c), sodium acetate at pH 5.5 (d), sodium acetate at pH 5.0 (e), sodium acetate at pH 4.5 (f), sodium acetate at pH 4.0 (g), citric acid at pH 3.5 (h); all buffers were used at 50 mM and supplemented with 150 mM NaCl, except PBS. Subsequently, proteins were analyzed via circular dichroism (CD).

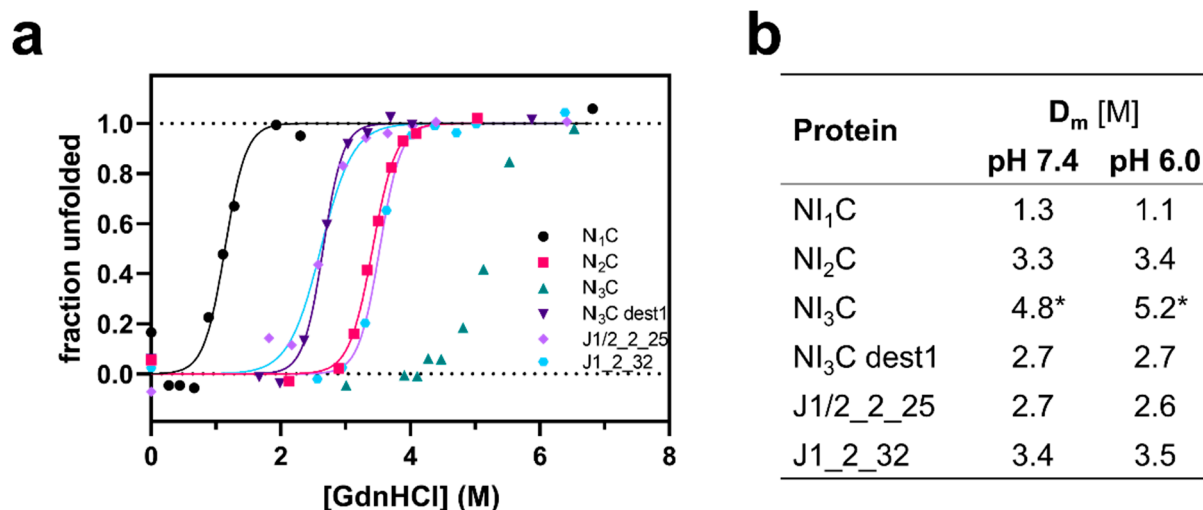

**Figure S7.** GdnHCl-induced equilibrium unfolding at pH 6 of NI<sub>1</sub>C, NI<sub>2</sub>C, NI<sub>3</sub>C, NI<sub>3</sub>C dest1, J1/2\_2\_25 and J1\_2\_32 in 50 mM MES (pH 6.0) supplemented with 150 mM NaCl at 20 °C analyzed by CD spectroscopy; (b) Denaturation midpoints ( $D_m$ ) were taken from Table 1 (PBS, pH 7.4) and by fitting Equation 1 to the data from (a). Values marked with an asterisk (\*) were estimated by a nonlinear fit (GraphPad Prism 8.0, X is concentration) to experimental data since fitting Equation 1 was not possible due to too few datapoints.



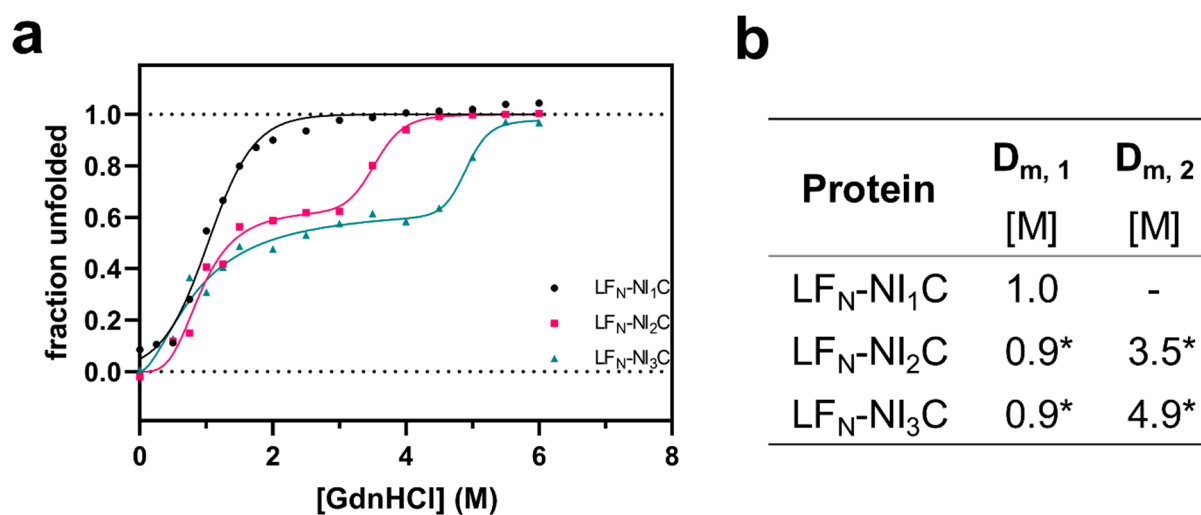

**Figure S8.** (a) GdnHCl-induced equilibrium unfolding of LF<sub>N</sub>-NI<sub>1</sub>C, LF<sub>N</sub>-NI<sub>2</sub>C and LF<sub>N</sub>-NI<sub>3</sub>C in PBS (pH 7.4) at 20 °C analyzed by CD spectroscopy. (b) The denaturation midpoint ( $D_{m,1}$ ) for LF<sub>N</sub>-NI<sub>1</sub>C was determined by fitting Equation 1 to the data obtained in (a). The two denaturation midpoints  $D_{m,1}$  and  $D_{m,2}$  of LF<sub>N</sub>-NI<sub>2</sub>C and LF<sub>N</sub>-NI<sub>3</sub>C, marked with an asterisk (\*), were estimated by fitting a nonlinear biphasic fit (GraphPad Prism 8.0) to the data.

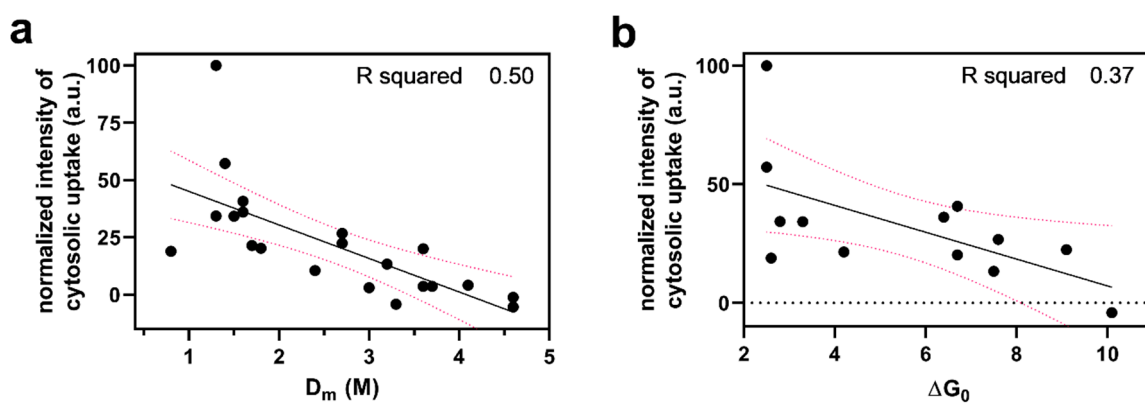

**Figure S9.** Correlation of normalized cytosolic uptake intensity of LFN-DARPin cargo and the denaturation midpoint (a) or  $\Delta G_0$  (b) of the DARPin. The coefficient of determination  $R^2$  was calculated using GraphPad Prism 8.0.
